# Supplementary material
Source: publisher site journal article supplement (https://www.degruyterbrill.com/publication/isbn/9783050049700/downloadAsset/9783050049700_Buchinformation.pdf)
Supplement: Supplementary file 1 [file 9783050049700_Buchinformation.pdf]

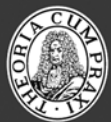

# Akademie Verlag

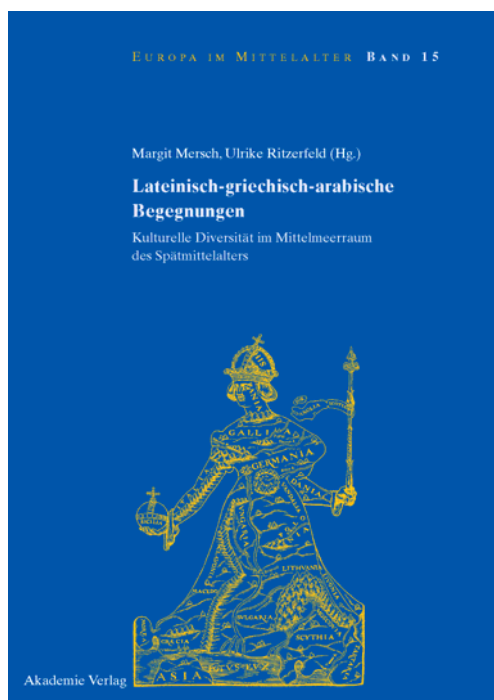

## Lateinisch-griechisch-arabische Begegnungen

Kulturelle Diversität im Mittelmeerraum  
des Spätmittelalters

Margit Mersch, Ulrike Ritzerfeld (Hrsg.)

*Europa im Mittelalter. Abhandlungen und Beiträge zur  
historischen Komparatistik, Band 15*

2009. 337 S. – 136 s/w- und 37 Farbbabb.  
170 x 240 mm, Festeinband, € 69,80  
ISBN 978-3-05-004664-8

Das spätmittelalterliche Mediterraneum war geprägt von komplexen Gesellschaften mit einem hohen Grad kultureller Heterogenität. Menschen mit unterschiedlichen ethnischen, religiösen und linguistischen Hintergründen lebten zum Teil schon seit Generationen, zum Teil erst kurzfristig mit- oder nebeneinander und kamen auf unterschiedlichen Ebenen miteinander in Kontakt. Die Erforschung dieser spätmittelalterlichen mediterranen „hotspots“ kultureller Diversität verspricht wichtige Erkenntnisse über die Konstruktion von sozialen und kulturellen Identitäten und über die integrativen und desintegrativen Prozesse in komplexen pluralen Gesellschaften. Dieser international und interdisziplinär zusammengestellte Sammelband behandelt Aspekte interkultureller Kommunikation, wie sie in Architektur, Bildkunst, Handwerksproduktion und Schrifttum reflektiert werden, untersucht die Genese hybrider Kunstformen sowie Kulturpraktiken und fragt nach der Rolle und Selbstverortung spezifischer Personen und Korporationen in interkulturellen Kontaktsituationen.

### Ebenfalls in der Reihe erschienen:

Wolfram Drews

#### **Die Karolinger und die Abbasiden von Bagdad**

Legitimationsstrategien frühmittelalterlicher Herrscherdynastien im transkulturellen Vergleich  
*Europa im Mittelalter. Abhandlungen und Beiträge zur historischen Komparatistik, Band 12*  
2009. 502 S. – 170 x 240 mm, Festeinband, € 59,80  
ISBN 978-3-05-004560-3
